# Supplementary material for: Systems Genetic Analysis of Osteoblast-Lineage Cells
Source: PubMed Central journal article supplement (PMC3531492; doi:10.1371/journal.pgen.1003150), 2012-12-27

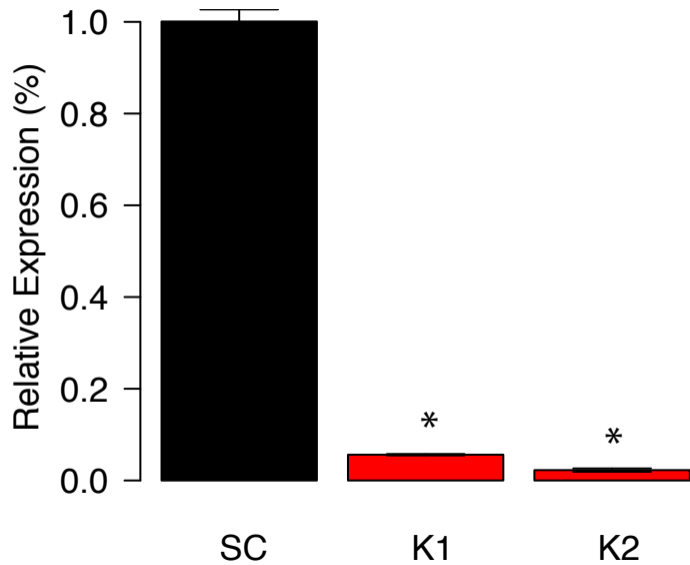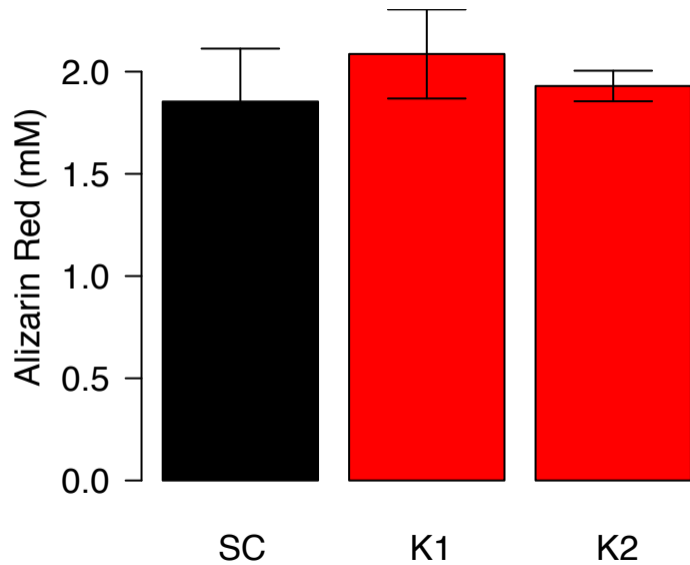

Supplement: pgen.1003150.s003.pdf [file pgen.1003150.s003.pdf]
